# Supplementary material for: Ku70 Functions in Addition to Nonhomologous End Joining in Pancreatic β-Cells: A Connection to β-Catenin Regulation
Source: PubMed Central journal article supplement — Diabetes. 2013 Jun 14;62(7):2429–38. doi: 10.2337/db12-1218 (PMC3712041; doi:10.2337/db12-1218), 2013-06-14

SUPPLEMENTARY DATA

**Supplementary Figure 1.** Absence of apoptosis in  $Ku70^{-/-}$  and  $Ku70^{-/-}p53^{pp}$  islets. Pancreatic sections from 3-month-old mutant mice and age-matched wild-type controls were analyzed with a TUNEL assay; no apoptotic cells were detected in the islets; a spleen from a 1-month-old  $Ku70^{-/-}$  mouse was used as a positive control. Magnification: 600X.

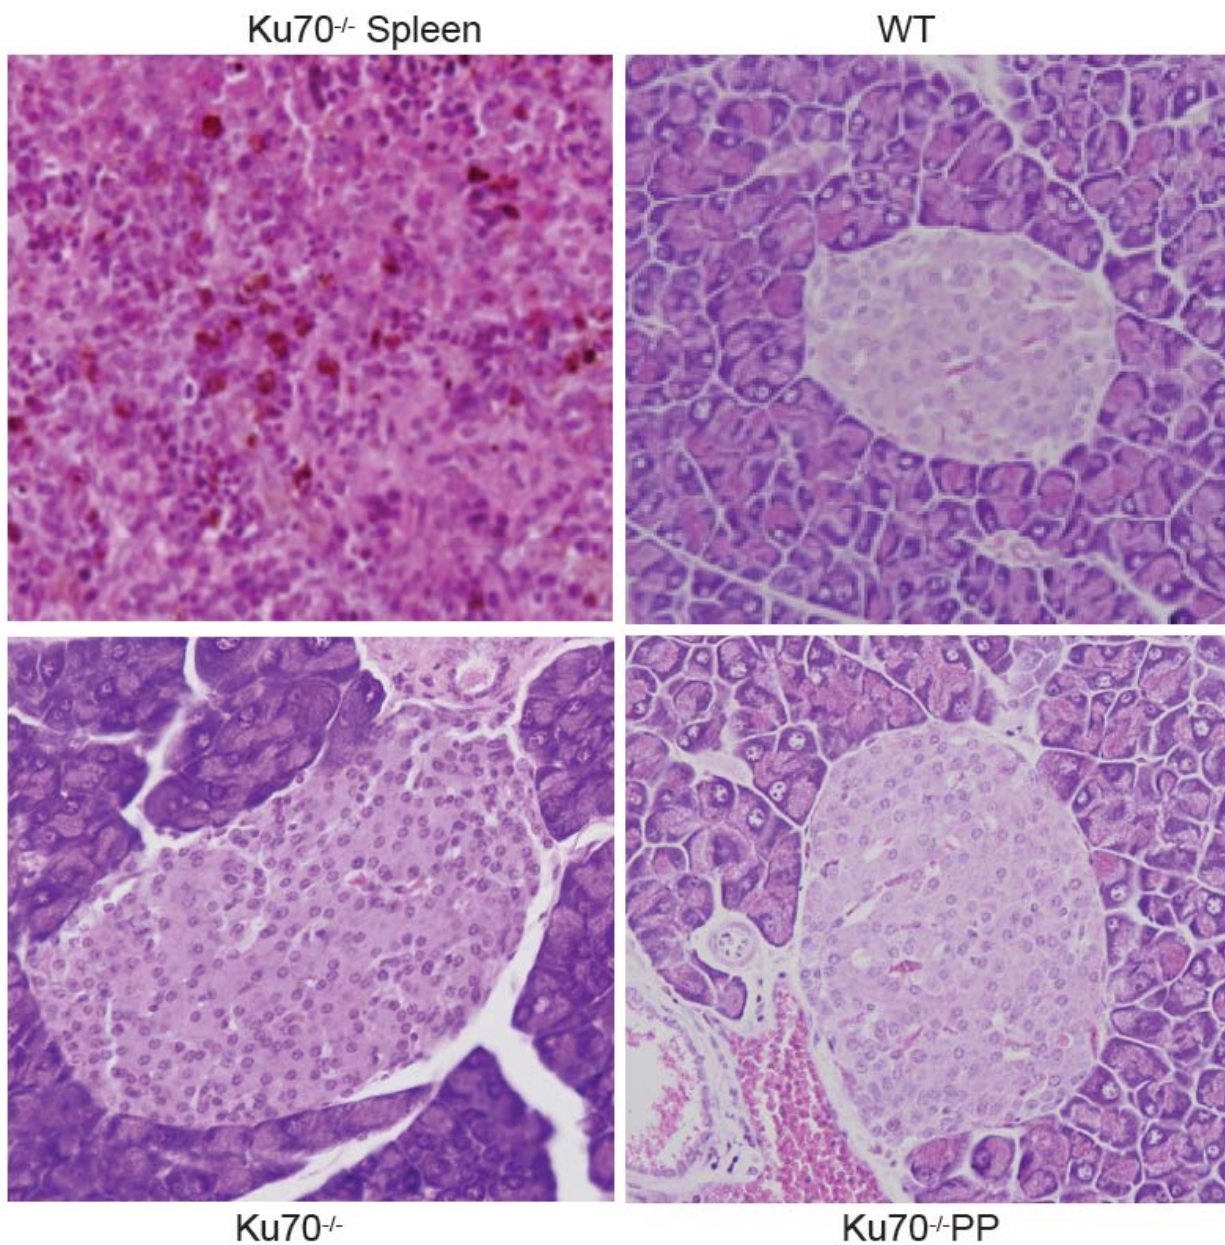

SUPPLEMENTARY DATA

**Supplementary Figure 2.** No significant difference in the ratio of pancreas weight to body mass. (A) Comparison of the pancreas weight to body mass ratio among genotypes.  $n \geq 8$  mice, between 4 and 5 months old, per genotype. (B) Representative immunohistochemical staining for glucagon of pancreatic sections from mutant and control mice. Magnification: 400X.

**A**

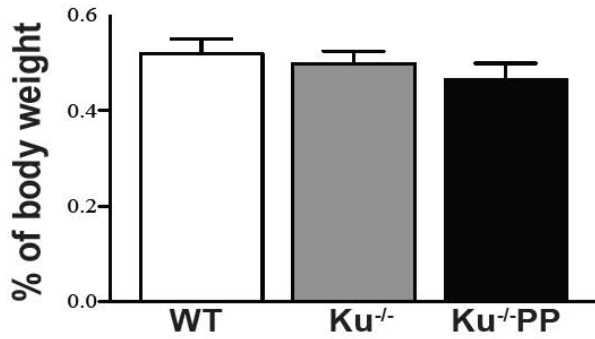

**B**

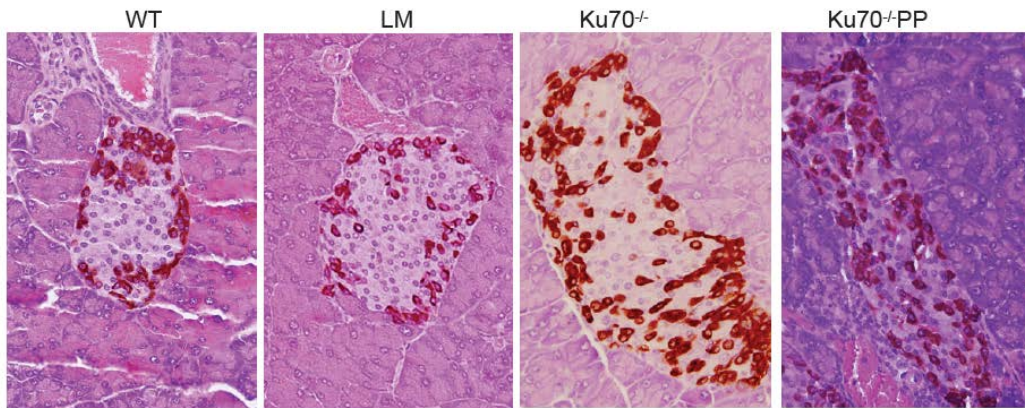

SUPPLEMENTARY DATA

**Supplementary Figure 3.** Increased  $\beta$ -catenin in early passage MEFs absent for Ku70. (A) Representative fields from wild-type,  $Ku70^{-/-}$ , and  $Ku70^{-/-}p53^{p/p}$  passage 2 MEFs stained for  $\beta$ -catenin antibody (green) and DAPI (blue). Left panels, magnification 400X. Identified cells in dashed yellow outline in right panel; magnification 1000X. (B) Western blot analysis using passage 2 MEFs examining the activation/degradation of  $\beta$ -catenin using indicated antibodies. GAPDH and actin are used as loading controls. We repeated these experiments one-three times. (C) Western blot analysis of cyclin D2 and CDK4 in passage 2 MEFs. Actin is used as a loading control. The data shown are a representative of three independent experiments. (D) Densitometry quantification of Western bands from S3B and S3C.

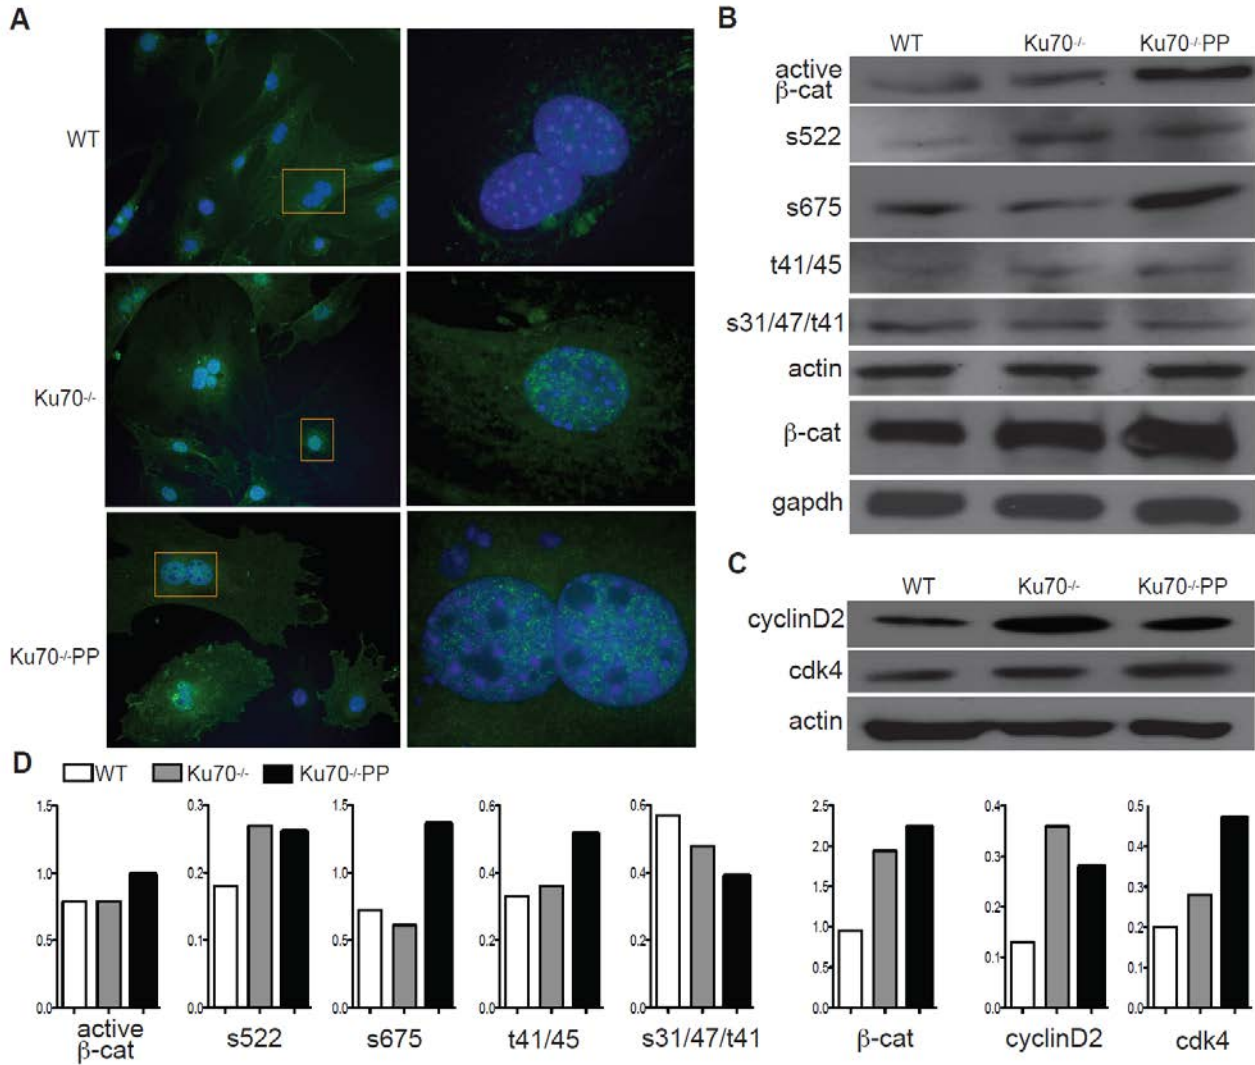

SUPPLEMENTARY DATA

**Supplementary Figure 4.** Preliminary analysis of random blood glucose level in  $Lig4^{-/-}Ku70^{-/-}p53^{p/p}$  triple mutant mice.

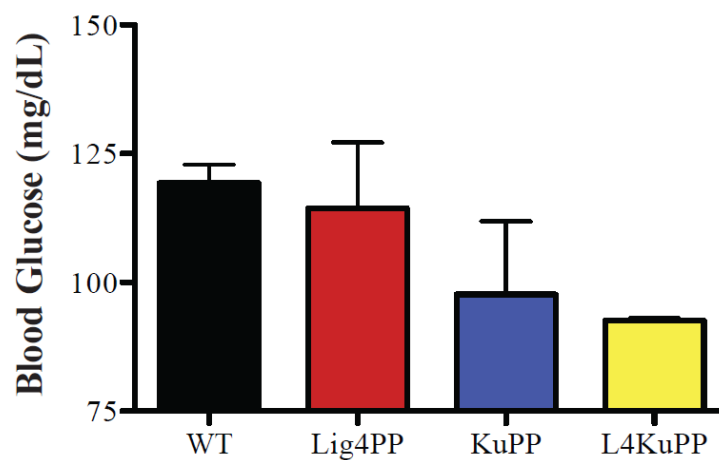

Supplement: supp_db12-1218_DB121218SupplementaryData.pdf [file supp_db12-1218_DB121218SupplementaryData.pdf]
